# Supplementary material
Source: PubMed Central journal article supplement (PMC3624261)
Supplement: MCB.01442-12_zmb999109921so4.pdf [file MCB.01442-12_zmb999109921so4.pdf]

## **Long et al. Supplementary Material**

## Supplementary Figure Legends

### Supplementary Table 1. Primers used to design dsRNA.

Primers were used to generate double-stranded RNA (dsRNA) from S2R+ cells. RT-PCR produced 200-500 bp templates from total RNA extracted from a cell population and templates were reverse transcribed *in vitro* to produce dsRNA. All primers (unless noted by \*\*) were designed using Snapdragon software and were generated including the T7 promoter sequence (TAATACGACTCACTATAGGG) at the 5' end. For primer sets denoted with \*\*, primers were previously published and were generated as listed (see supplemental references for full citations.)

### Supplementary Table 2. List of antibodies and primers used to validate dsRNA knockdown of candidate genes in *Drosophila* S2R+ cells

**A.** Antibodies used in Western blot validation of protein knockdown of candidate genes in S2 cells. Sources are listed for commercially available antibodies. For antibodies generated by individual research groups, the investigator name and original publication are referenced (see supplemental references for full citations.) **B.** Primer sets utilized for validation of candidate gene expression. Primers were designed using PrimerQuest (IDT DNA.) Quantitative real time PCR was performed using the Life Technologies 7900HT.

### Movie 1. Control dsRNA treated cell.

*Drosophila* S2R+ cells were transfected with dsRNA for 72 hours. Twenty-four hours prior to plating, cells were transfected with EB1-GFP to mark the growing MT plus ends. Cells were plated on Concanavalin A for 1 hour to facilitate adhesion and spreading.

Images were collected of a single plane of focus using spinning disk confocal microscopy. Time-lapse image series were acquired for a period of 1 minute at a frame capture rate of every 750 ms using 400 ms exposure.

**Movie 2. CLASP dsRNA treated cell.**

*Drosophila* S2R+ cells were transfected with dsRNA for 72 hours. Twenty-four hours prior to plating, cells were transfected with EB1-GFP to mark the growing MT plus ends. Cells were plated on Concanavalin A for 1 hour to facilitate adhesion and spreading. Images were collected of a single plane of focus using spinning disk confocal microscopy. Time-lapse image series were acquired for a period of 1 minute at a frame capture rate of every 750 ms using 400 ms exposure.

**Movie 3. Klarsicht dsRNA treated cell.**

*Drosophila* S2R+ cells were transfected with dsRNA for 72 hours. Twenty-four hours prior to plating, cells were transfected with EB1-GFP to mark the growing MT plus ends. Cells were plated on Concanavalin A for 1 hour to facilitate adhesion and spreading. Images were collected of a single plane of focus using spinning disk confocal microscopy. Time-lapse image series were acquired for a period of 1 minute at a frame capture rate of every 750 ms using 400 ms exposure.

Long et al. Supplementary Table 1

| Gene       | Abbrev       | CG #     | Ortholog      | Forward                                   | Reverse                                    | Source                              |
|------------|--------------|----------|---------------|-------------------------------------------|--------------------------------------------|-------------------------------------|
| 4EHP       |              | CG33100  | eIF4E2        | GGACGCATGTTGTGTGTGT                       | TGGGTTTTTGGTGGATTCTC                       | DRSC41089                           |
| Abi        |              | CG9749   |               | CTTCCAGGAAAGCTCAGTGC                      | CCGTGGATTCTGTGTGTTTG                       |                                     |
| Abl        |              | CG4032   |               | TAGCTACAACAAATCGGGGG                      | AGCTCGGCCAGAGTGTAAAA                       |                                     |
| APC1       |              | CG1451   | APC           | AGATACGCCAGCATTGCTCT                      | TCTTCGGACTTGCTCCTGTT                       |                                     |
| Bifocal    |              | CG1822   |               | CCACAAAAGGTAACGGTAAAAACC**                | TAATACGACTCACTATAGGGGCTGATTCTCTGGCTGTTCC   | Goshima et al., 2007 <sup>1</sup>   |
| C3G        |              | CG42328  | Rapgef1       | ATTATGCCCATGAGCAAGGA                      | CCCGTCCTCCTCTCTTCT                         |                                     |
| Cadherin N | CadN         | CG7100   | N-cadherin    | TAATACGACTCACTATAGGATTCCTCATCACTGCTCGCT** | TAATACGACTCACTATAGGTCGCAGTACTCGTCTTGGTG**  | Kiger et al., 2003 <sup>2</sup>     |
| Calmodulin | Cam          | CG8472   | Calmodulin    | TGACTTCCCTGAATTCCTTACC                    | TAATACGACTCACTATAGGGGTCGCCATCGATATCAGCC    | Goshima et al., 2007 <sup>1</sup>   |
| Cappuccino | Capu         | CG3399   |               | TAATACGACTCACTATAGGAATGAAATGGAGCAAGGTGG** | TAATTAACCCTCACTAAAGGGCGAAATGTGGGCATAATCT** | Kiger et al., 2003 <sup>2</sup>     |
| Capulet    | Capt         | CG33979  | Formin        | AGAGCTGAGCCAATACC                         | ATAAGTGACCTTCTTCA                          |                                     |
| CG17272    |              | CG17272  |               | CATTTGGCCAACCTTATTGTGC                    | TAATACGACTCACTATAGGGACGATCCAAGAACTGGTTTCC  | Goshima et al., 2007 <sup>1</sup>   |
| CG31957    |              | CG1957   | eIF1AD        | TTTCGATGCCCAACAAATTC                      | TAATACGACTCACTATAGGGTTCAGTCTCTTCGCTGGAT    |                                     |
| Clip190    |              | CG5020   | Clip170       | GGCAAGGAGAATCTTTGGCAG                     | GAAGTCTTTTGTGAAGGGA                        |                                     |
| Disabled   |              | CG9695   | Dab           | TAATACGACTCACTATAGGACAAGCAGCGATAACCATC**  | AATTAACCCTCACTAAAGGTGGTAACGAACCTCTTTGG**   | Kiger et al., 2003 <sup>2</sup>     |
| eIF2B      |              | CG4153   | eIF2B4        | AGGACAACAGCTCAACCT                        | AGGTTGTTTTTGTCTCGTATG                      |                                     |
| eIF3-S10   |              | CG9805   | eIF3A         | GAGGCTGAGGACGAAAAGC                       | CAGTCCCTCCAGTTTCCC                         |                                     |
| eIF4E      |              | CG4035   |               | AGCGCCCCAGCACC                            | TCTTCTTGAATAGCGAGTAGT                      | DRSC11342                           |
| Enabled    | Ena          | CG15112  |               | TACCACCAGCAACAGCATC                       | GTTGAGGGCGAAACGC                           |                                     |
| Fax        |              | CG4609   |               | TACCTGGACTCGGGACTCA                       | CACTTGTCTTCATGCGAGA                        |                                     |
| Fmr1       |              | CG6203   | Fxr1          | CGTGCCCGAGAGTATGAAAT                      | ATTGTGCGCTGAAACTCCTT                       |                                     |
| Fps85D     |              | CG8874   | FER           | TCTCGTTGACTTGAGCACA                       | TCTCTGGCTCTGGAGTTGGT                       | DRSC39364                           |
| GFP        |              |          |               | AGAGATGTTAATGGGCACAAATTTTCT               | AGATTGTATAGTTATCCATGCCATG                  |                                     |
| Jaguar     | Jar          | CG5695   | Myosin 6      | AGACCACCTAATCAAATATAGTTATATTTAC           | AGACCACTCAGATCCGAAAATCTTCGAGCCC            | Petritsch et al., 2003 <sup>3</sup> |
| Karst      |              | CG12008  | Beta spectrin | TAATACGACTCACTATAGGTTTACACCGATGCCAATGAA** | TAATTAACCCTCACTAAAGGACGCTATCTGCGTTCTCGTT** | Kiger et al., 2003 <sup>2</sup>     |
| Klarsicht  | Klar         | CG170469 |               | CAGGGCACTCTCACTGATC                       | AGCACCAGCCCTCGAC                           | Sepp et al., 2008 <sup>4</sup>      |
| Klp10A     |              | CG1453   | KIF2A         | ATGGACATGATTACGGTG                        | CATCGATCTCCTTGGGATT                        |                                     |
| Krasavietz | Kra/<br>Exba | CG2922   |               | GCGAATGGAACAAGAAGGAG                      | CTGACTGAAGCCATTGCGACA                      |                                     |
| LAR        |              | CG10443  |               | ATGGGTCTGCAGATGACAG                       | CCACGGCGAGTGGATTG                          | DRSC 01707                          |
| Mekkl      |              | CG7717   | Map3K4        | AAATCACCCAGCACTTGGAC                      | CGCCCTTATATGCACCTTGT                       |                                     |

Long et al. Supplementary Table 1

|                 |       |         |                       |                                           |                                              |                                   |
|-----------------|-------|---------|-----------------------|-------------------------------------------|----------------------------------------------|-----------------------------------|
| Minispindles    | Msps  | CG5000  | TOG                   | GATCCAAGGTGAATCATAATGCC                   | GAGACAATGAGGACGATGATGG                       |                                   |
| NCD             |       | CG7831  | KIFC1                 | GCTCTAAGCACAGAAGTGGTGC                    | CCATTCTGAATCTCCATGTCC                        |                                   |
| Orbit/MAST      | CLASP | CG32435 | CLASP                 | ATCAGCACCACCACAAACAA                      | TGTGAGAAGTGAGGATTGCG                         |                                   |
| P150glued       |       | CG9206  | Dynactin 1            | AGACCACCAGCGATTCACTGC                     | AGATTCTTCTCCGCTAGATCC                        |                                   |
| P190RhoGap      |       | CG32555 |                       | TAATACGACTCACTATAGGGAAGAAGTCCTTCAGTGCCG** | TAATTAACCCTCACTAAAGGAAACCAGAGCCATGTGTTCC**   | Kiger et al., 2003 <sup>2</sup>   |
| Par1            |       | CG8201  | MARK3                 | GGTTCGCCTAACATGCAAAAT                     | CTCCTTCTCCTTCATGCGTC                         | DRSC 31375                        |
| Peanut          |       | CG8705  | Septin7               | CGCCTCCAACGG                              | TCCTGAAGGTGC                                 | Somma et al., 2002 <sup>5</sup>   |
| Phospholipase D | Plid  | CG12110 | PLD3                  | CGTCGTAATCGACCAAACCT                      | CTTCATCGCGTTGTTCTTCA                         | DRSC 38086                        |
| PlexinA         |       | CG11081 | PlexinA2              | ATTGTAGTCATTAAACTCTCGG                    | TCTAATACGACTCACTATAGGGATACATTCCAACCAAAAAACAG | DRSC17220                         |
| Pod-1           |       | CG4532  | Coronin7              | TTCTTTGACTTCGCCTGGAGT                     | CCTTGCCCGTAACAAAACAGT                        |                                   |
| PP2A-B'         |       | CG7913  | PP2R5c/d              | GAGTGCCGCCGGTCCAC                         | TAATACGACTCACTATAGGGGATAACGAGGCGTTAGATCC     | DRSC16337                         |
| Puckered        | Puc   | CG7850  |                       | TATAGAAAACACACCCCGCCT                     | TCGTAGGCCTCCTGGAGTA                          | DRSC 31024                        |
| Rab5            |       | CG3664  | Rab5A                 | TAATACGACTCACTATAGGGTCTGGCCAGCCGTG**      | TAATACGACTCACTATAGGGGCAACCACTCCACGCA**       | Kiger et al., 2003 <sup>2</sup>   |
| Rapgap1         |       | CG34374 | Rap1gap               | ACCACCGAGGAGGAACCTTTT                     | GTCGGGTGAGAATGGAGTGT                         |                                   |
| RfC38           |       | CG6258  | RfC3                  | GACGCATCAAATTGAGATTAGT                    | CGTGAGTAGCTCGTACAG                           | DRSC 01997                        |
| Rhogef2         |       | CG9635  |                       | ATGGATCACCCATCAATCAAAAAACGG               | TGTCCCGATCCCTATGACCACTAAGGC                  | Rogers et al., 2004 <sup>6</sup>  |
| Roundabout      | Robo  | CG13521 | Robo2                 | CACTATTCATGGACCCACC                       | GCAGGTCTCACTGGAAGAGG                         |                                   |
| Roughened       | Rap1  | CG1956  | Rap1A                 | AAAGCCAACCAACAACAAG                       | TTGATGCAACTGATCGTGGT                         |                                   |
| SF2             |       | CG6987  | SFRS                  | CGATCGGAAGCGAGAGT                         | TAATACGACTCACTATAGGGCGACGATGCGGTGAAG         | DRSC16845                         |
| Shortstop       | Shot  | CG18076 | MACF1                 | CCACGGAGTACCATCAGTT                       | CAGCCCTTAACCACACGAAT                         |                                   |
| Su{dx}          |       | CG4244  | Ubiquitin ligase      | TTCTCCCAGCCATCTGGTA                       | TAATACGACTCACTATAGGGACACAACCAGCTGCTGTTT      | DRSC00791                         |
| Syndecan        | Sdc   | CG10497 |                       | CACTCTGCGTATGTGGGTGT                      | CCTGCTCTTTCTGCTTTTGC                         |                                   |
| TACC            |       | CG9765  |                       | AGTGAGAAGGAGCAGCAAGC                      | CATCTTGTCGTAGCGCTGT                          | DRSC36042                         |
| Tra2            |       | CG10128 | Tra2a/b               | GATAGTTGTCATAGGGCGAAGC                    | TAATACGACTCACTATAGGGACTTCTGACATACAGACACAGCG  | Goshima et al., 2007 <sup>1</sup> |
| Tribbles        | Trbl  | CG5408  | Trib                  | TGACAGATCTGGTGAATATGG                     | TAACAGTAGCGGTCAAAACAGC                       | Goshima et al., 2007 <sup>1</sup> |
| Wallenda        |       | CG8789  | MapKKK 12/13          | AGTGGCAGGCTAAAGAACGA                      | GCTTGAGAGAGTTGTTGCC                          |                                   |
| Wasp            |       | CG1520  | WASL                  | CAAACGACAAGAGAAACGCA                      | CCTGCCTTACGAAGAATC                           |                                   |
| Zipper          |       | CG15792 | Myosin heavy chain 10 | TTCAGCTTGGCCAGGTGT                        | CGCGAGAAGCTTGACAC                            | Sepp et al., 2008 <sup>4</sup>    |

## Long et al. Supplementary Table 2

A.

|               | Citation                                 | Source and catalog #               | Notes                                               |
|---------------|------------------------------------------|------------------------------------|-----------------------------------------------------|
| Abi           | Lin et al., 2009 <sup>7</sup>            |                                    | Generous gift of J.L. Juang (NHRI)                  |
| Abl           | Wills et al., 2000 <sup>8</sup>          |                                    |                                                     |
| APC           |                                          | Santa Cruz Biotechnology (sc15803) |                                                     |
| CadN          |                                          | DSHB (DN-Ex#8)                     |                                                     |
| Capulet       | Wills et al., 2000 <sup>8</sup>          |                                    |                                                     |
| Clip190       | Lantz and Miller, 1998 <sup>9</sup>      |                                    | Generous gift of Kathryn Miller (Wash. Univ)        |
| Disabled      |                                          | DSHB (P4D11)                       |                                                     |
| eIF4E         | Lachance et al., 2002 <sup>10</sup>      |                                    | Generous gift of Paul Lasko (McGill Univ.)          |
| eIF3-S10      |                                          | Abnova (ABVAPB6VV)                 |                                                     |
| Ena           |                                          |                                    |                                                     |
| Fmr1          |                                          | Abcam (ab10299)                    |                                                     |
| Jar           | Kellerman and Miller, 1992 <sup>11</sup> |                                    | Generous gift of Kathryn Miller (Wash. Univ)        |
| Karst         | Zarnescu and Thomas, 1999 <sup>12</sup>  |                                    | Generous gift of Graham Thomas (Penn State Univ.)   |
| Klp10A        | Rogers et al., 2004 <sup>13</sup>        |                                    | Generous gift of David Sharp (Albert Einstein)      |
| LAR           | Sun et al., 2001 <sup>14</sup>           |                                    | Generous gift of Kai Zinn (UCSF)                    |
| Msp5          | Lee et al., 2001 <sup>15</sup>           |                                    | Generous gift of Jordan Raff (Univ. of Oxford)      |
| NCD           | Hatsumi and Endow, 1992 <sup>16</sup>    |                                    | Generous gift of Sharon Endow (Duke Univ.)          |
| Orbit (CLASP) | Lee et al., 2004 <sup>17</sup>           |                                    |                                                     |
| Peanut        |                                          | DSHB (4C9H4)                       |                                                     |
| Pod-1         | Rothenberg et al., 2003 <sup>18</sup>    |                                    | Generous gift of Yuh Nung Jan (UCSF)                |
| PP2A-B'       |                                          | Millipore (07-1221)                |                                                     |
| Rab5          |                                          | Abcam (ab21261)                    |                                                     |
| Robo          |                                          | DSHB (13C9)                        |                                                     |
| Shot          | Lee et al., 2000 <sup>19</sup>           |                                    | Generous gift of Peter Kolodziej (Vanderbilt Univ.) |
| TACC          | Gergely et al., 2000 <sup>20</sup>       |                                    | Generous gift of Jordan Raff (Univ. of Oxford)      |

B.

|                  | Foward Primer             | Reverse Primer           |
|------------------|---------------------------|--------------------------|
| 4EHP             | ACCCGGAAAGGATAAGGCACAGGA  | TGTTGTGTGTGTGTGTGTGTGG   |
| Bifocal          | TCACAGAACCGGCGACAATCAGTA  | ACCTCCAGTGGATCGGAATTGGT  |
| C3G              | TGTGCGGCGAATGGAAAGCTATTG  | TGCCTGCCCGATTGTGGTAAATTG |
| Cam              | ACCAGCAGCAACAACAAGAGTCG   | TTCTTGCTTCTCCCTCTGCTGTG  |
| Capu             | CAAATCGATGGCCAAGCTGCATCA  | TGAGAAGTGGTAGAAGCGCATGGT |
| CG17272          | ATCCGCAGAATAAGGGCACCATCT  | ATTGTTGTTTACATTGGCCTCCCG |
| eIF1AD (CG31957) | ACGTTCCCTTGTTCGATGCCAAC   | TCTCGGCTTGACTTTATCGCCCT  |
| eIF2B            | ACCGCGATTACACATACGACGAGT  | TCGCATCACGAACTTTGGCTTTCG |
| Fax              | TGCCATGTCTGGAGAACCATCTCAT | AGTTGACCTTGTAGCCCTTGAGCA |
| Fps85D           | ATGTGAATGCCATCGAAAAGTGCCG | AAGACAGGGAACGCTCTTGGAGT  |
| Klarsicht        | CACGCGATTGTCTTGCACCTCAAA  | AAATCCGTTAGGGTGGCTGTACCA |
| Kra              | AAGTCATCCAGAAGAAGCAGCCCA  | TGGTCTTGATGCGTTGACCCGATA |
| Mekk1            | GCGCGTGTACTAAAGTGCAAGT    | TTGTTGCACTCTTCGCTGTTT    |
| P150glued        | TAAAGCAGCGCAGGAACGAGGATA  | AACTCCTTCTGAAGCGAAGCCTGA |
| P190RhoGap       | AGACGTGTTGTCTCGTGAAGTGA   | TACACTATCCGATTGCTGGGT    |
| Par1             | TCGACTTAGAATGGCATCGGCTGT  | GCTGTGTGTTCGCTGCTGTT     |
| Phospholipase D  | CTGCGGTTCCGCAAACATTAACGA  | TCCGCTCGGATACTTCTGCCATT  |
| PlexinA          | GCTTTCGCCAACTCCAACTGAA    | AGAAGCTCAGGAGTTCCTTGT    |
| Puc              | GAGCGCGTGCATATGTGTGTGAAT  | GCGCTTCTCGCTTTATCCGCATT  |
| Rap1             | ACACACACACATTCGCAACCAG    | TTTGTGGTCTCTCTGCACCTTCT  |
| Rapgap1          | ACCACAGACTACCTGGATGGCAAA  | TCCCAACTGCTCATCCAGTCCAAT |
| Rfc38            | ACTTCCACAAGGATCAAGCGGAGA  | CACATGATGCGTGTCTTCTTGCCA |
| Rhogef2          | TGTCGAGGTCAACCAGGCAGTAAA  | TGATCGTCAGATTGCCGTCATGGA |
| Sdc              | ACAAGTGCAGGAACAAGTGTGCG   | CAGTTGAGCCAAACCAACCCAGT  |
| SF2              | GGCCATTTGTTCATTGTGAGCGTGA | ACTTTGCCGAACCTGTGGAACAGG |
| Su{dx}           | AGCACTCACACTCAGCCACTAA    | AAGCCTCCTCGATTGTACGCTTA  |
| Tra2             | TCTCCGCAACTACGTCGAACTTCA  | TCGTATGCTCCTTTACAGCCGTT  |
| Trbl             | AACTATTTCGTCACCAGTCTCGCCA | ATGGTCTGCAGCATCTTGGCATTG |
| Wallenda         | AGAGAGCGGATTGGAACCTCGGTTT | TTCTGCTCTTCTTGGAGTTCGCT  |
| Wasp             | TTTCTGCTTACCTTCGAGGGCAGT  | CCGGTTGCGTTTCTTGTGCTTT   |
| Zipper           | AACAGATCGCCAAAGAGCGTGATA  | TGGAGGGTCTTTCGCTTGTCTCA  |

**Supplementary References (as referenced in Supplementary Tables 1 and 2):**

1. Goshima, G. *et al.* Genes required for mitotic spindle assembly in *Drosophila* S2 cells. *Science* **316**, 417-421 (2007).
2. Kiger, A.A. *et al.* A functional genomic analysis of cell morphology using RNA interference. *J Biol* **2**, 27 (2003).
3. Petritsch, C., Tavosanis, G., Turck, C.W., Jan, L.Y. & Jan, Y.N. The *Drosophila* myosin VI Jaguar is required for basal protein targeting and correct spindle orientation in mitotic neuroblasts. *Dev Cell* **4**, 273-281 (2003).
4. Sepp, K.J. *et al.* Identification of neural outgrowth genes using genome-wide RNAi. *PLoS Genet* **4**, e1000111 (2008).
5. Somma, M.P., Fasulo, B., Cenci, G., Cundari, E. & Gatti, M. Molecular dissection of cytokinesis by RNA interference in *Drosophila* cultured cells. *Mol Biol Cell* **13**, 2448-2460 (2002).
6. Rogers, S.L., Wiedemann, U., Hacker, U., Turck, C. & Vale, R.D. *Drosophila* RhoGEF2 associates with microtubule plus ends in an EB1-dependent manner. *Curr Biol* **14**, 1827-1833 (2004).
7. Lin, T.Y. *et al.* Abi plays an opposing role to Abl in *Drosophila* axonogenesis and synaptogenesis. *Development* **136**, 3099-3107 (2009).
8. Wills, Z. *et al.* A *Drosophila* homolog of cyclase-associated proteins collaborates with the Abl tyrosine kinase to control midline axon pathfinding. *Neuron* **36**, 611-622 (2002).

9. Lantz, V.A. & Miller, K.G. A class VI unconventional myosin is associated with a homologue of a microtubule-binding protein, cytoplasmic linker protein-170, in neurons and at the posterior pole of *Drosophila* embryos. *J Cell Biol* **140**, 897-910 (1998).
10. Lachance, P.E., Miron, M., Raught, B., Sonenberg, N. & Lasko, P. Phosphorylation of eukaryotic translation initiation factor 4E is critical for growth. *Mol Cell Biol* **22**, 1656-1663 (2002).
11. Kellerman, K.A. & Miller, K.G. An unconventional myosin heavy chain gene from *Drosophila melanogaster*. *J Cell Biol* **119**, 823-834 (1992).
12. Zarnescu, D.C. & Thomas, G.H. Apical spectrin is essential for epithelial morphogenesis but not apicobasal polarity in *Drosophila*. *J Cell Biol* **146**, 1075-1086 (1999).
13. Rogers, G.C. *et al.* Two mitotic kinesins cooperate to drive sister chromatid separation during anaphase. *Nature* **427**, 364-370 (2004).
14. Sun, Q., Schindelholz, B., Knirr, M., Schmid, A. & Zinn, K. Complex genetic interactions among four receptor tyrosine phosphatases regulate axon guidance in *Drosophila*. *Mol Cell Neurosci* **17**, 274-291 (2001).
15. Lee, M.J., Gergely, F., Jeffers, K., Peak-Chew, S.Y. & Raff, J.W. Msps/XMAP215 interacts with the centrosomal protein D-TACC to regulate microtubule behaviour. *Nat Cell Biol* **3**, 643-649 (2001).
16. Hatsumi, M. & Endow, S.A. The *Drosophila* *ncd* microtubule motor protein is spindle-associated in meiotic and mitotic cells. *J Cell Sci* **103** ( Pt 4), 1013-1020 (1992).



17. Lee, H. *et al.* The microtubule plus end tracking protein Orbit/MAST/CLASP acts downstream of the tyrosine kinase Abl in mediating axon guidance. *Neuron* **42**, 913-926 (2004).
18. Rothenberg, M.E., Rogers, S.L., Vale, R.D., Jan, L.Y. & Jan, Y.N. Drosophila pod-1 crosslinks both actin and microtubules and controls the targeting of axons. *Neuron* **39**, 779-791 (2003).
19. Lee, S., Harris, K.L., Whittington, P.M. & Kolodziej, P.A. short stop is allelic to kakapo, and encodes rod-like cytoskeletal-associated proteins required for axon extension. *J Neurosci* **20**, 1096-1108 (2000).
20. Gergely, F., Karlsson, C., Still, I., Cowell, J., Kilmartin, J., and Raff, J.W. 2000. The TACC domain identifies a new family of centrosomal proteins that can interact with microtubules. **Proc. Nat. Acad. Sci.** 97, 14352-57
